# Supplementary material for: A truncated form of a transcription factor Mamo activates vasa in Drosophila embryos
Source: PubMed Central journal article supplement (PMC6868150; doi:10.1038/s42003-019-0663-4), 2019-11-20
Supplement: 42003_2019_663_MOESM1_ESM.pdf [file 42003_2019_663_MOESM1_ESM.pdf]

### **Supplementary Figure 1**

Nucleotide and predicted amino acid sequences of full-length and short-form Mamo cDNAs. Arrows indicate the transcription initiation site of EST clones (GM29022 and GM29051), and the transcription initiation sites revealed by 5'-RACE, respectively. The alternative transcriptional start sites indicated by the arrows labeled with #1 and #2. The number of clones isolated with each transcription initiation sites are 5 and 2, respectively. Boxes indicates translational start codon of short-isoforms of Mamo, respectively. Grey indicates the BTB/POZ-domain. Yellow indicate the Zn-finger domains.



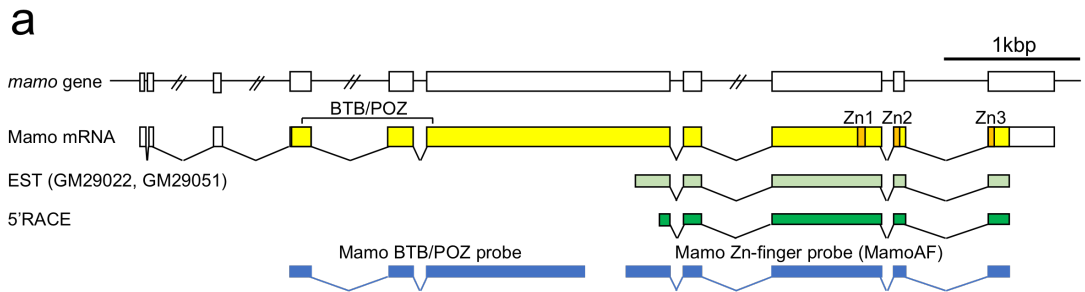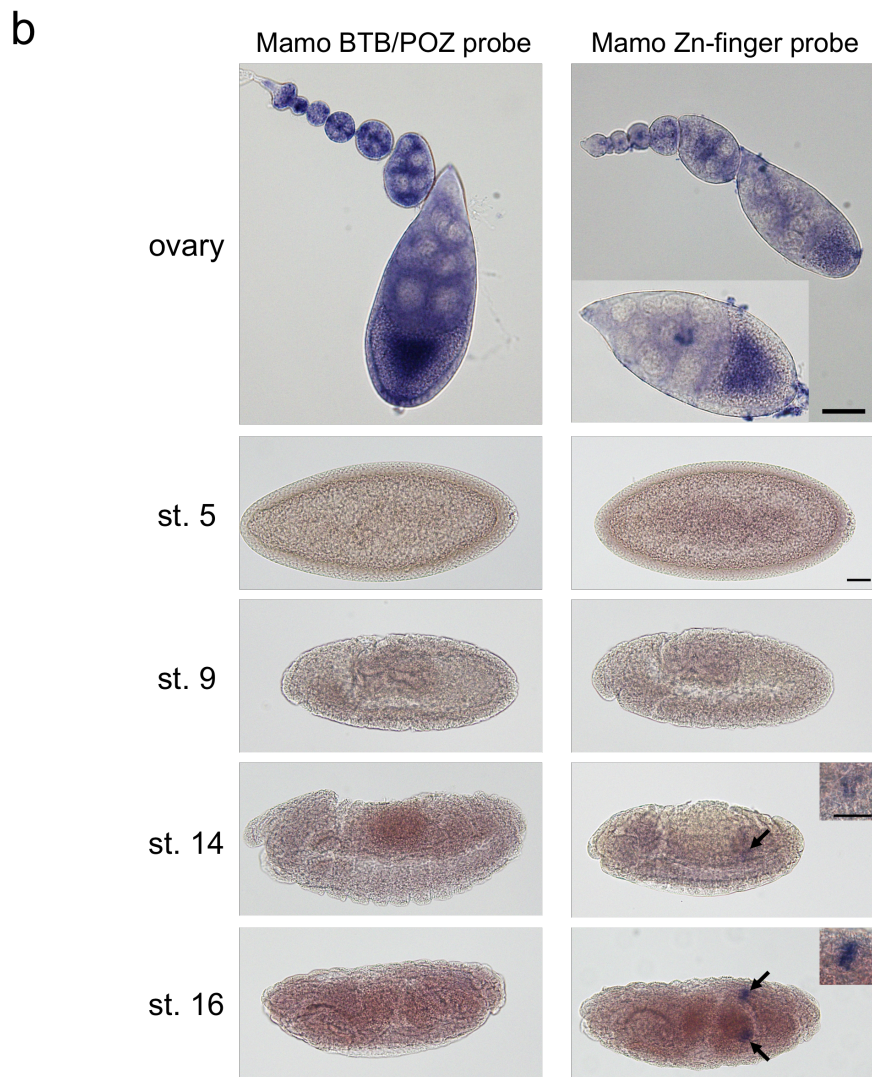

**Supplementary Figure 2**

The Mamo mRNA encoding Mamo short-isoform is expressed in PGCs. **a** A schematic diagram of *mamo* locus. **b** *in situ* hybridisation of wild type ovaries and embryos using a Mamo BTB/POZ probe (left panels) or a Mamo Zn-finger probe (right panels). Arrows indicate the embryonic gonads containing PGCs, in which Mamo mRNA encoding Mamo short-isoform is expressed. Insets indicate close-up views of the embryonic gonads. Scale bar: 30  $\mu$ m.

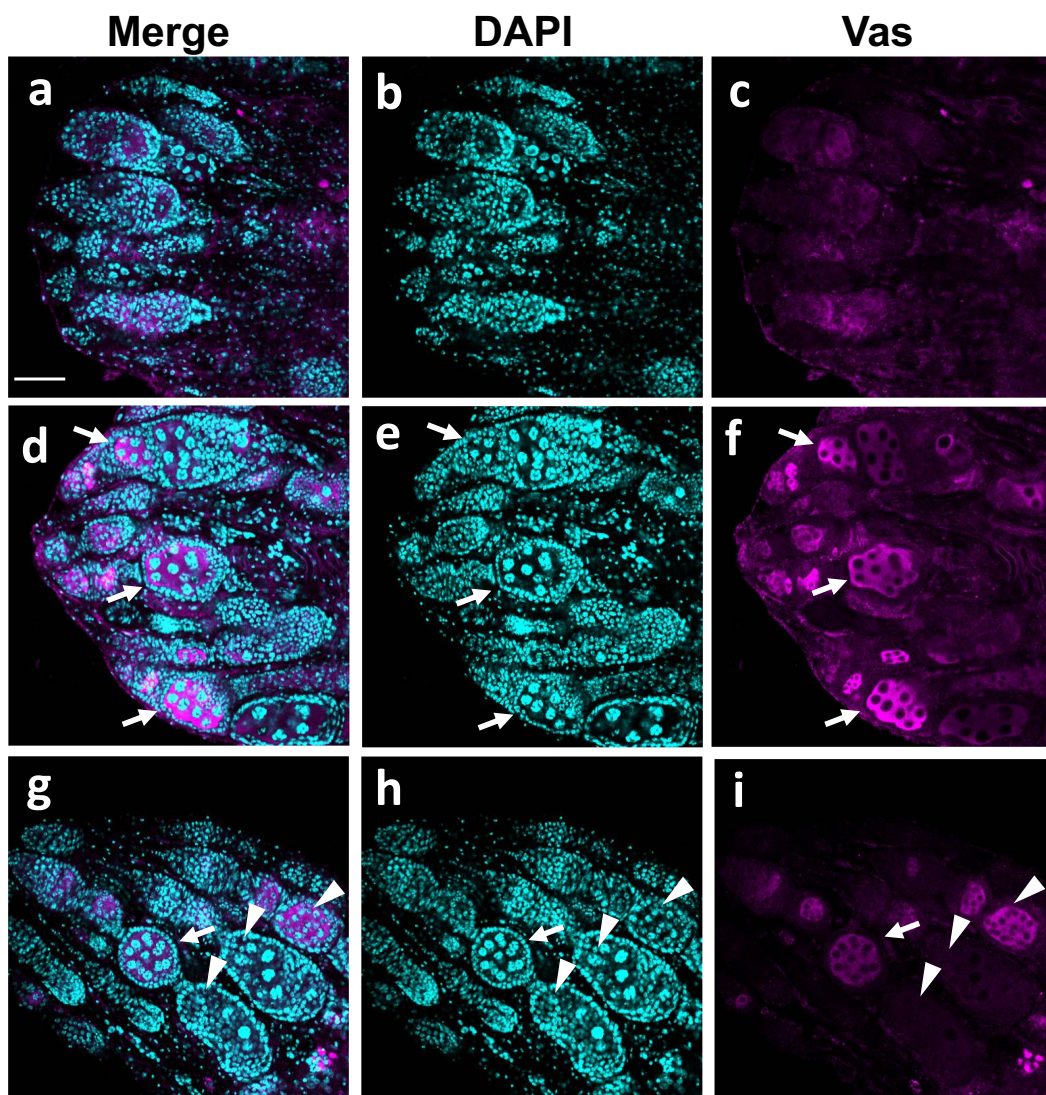

**Supplementary Figure 3** Differentiation of egg chambers containing *mamo* mutant germline clones expressing full-length Mamo-FLAG or MamoAF-FLAG. Immunostaining of the ovarioles containing *mamo* mutant germline (**a-c**) and the ovarioles containing *mamo* mutant germline clones expressing full-length Mamo-FLAG (**d-f**) and MamoAF-FLAG (**g-i**). Arrows indicate differentiating egg chambers after oogenic stage 6. Arrowheads indicate degenerating egg chambers. Scale bar: 50  $\mu\text{m}$ .

**a***nos-Gal4>UASp-Mamo-FLAG*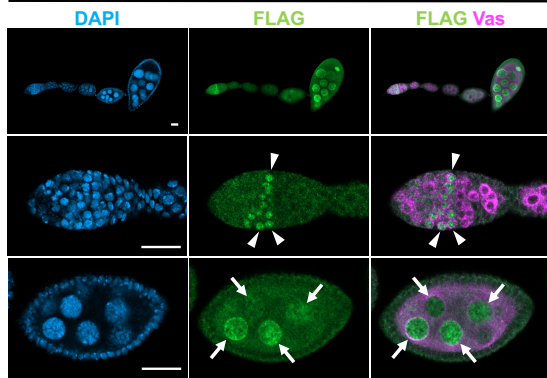**b***nos-Gal4>UASp-MamoAF-FLAG*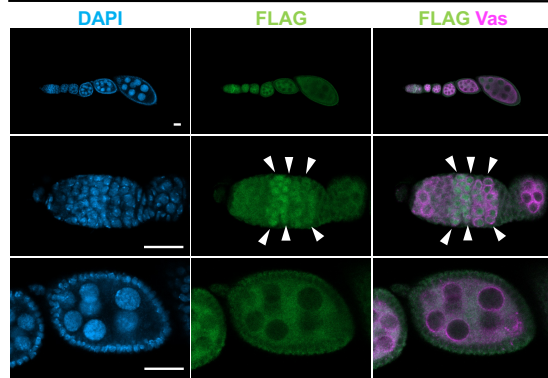

**Supplementary Figure 4** Expression patterns of full-length Mamo-FLAG and MamoAF-FLAG in ovaries. Immunostaining of the ovarioles expressing full-length Mamo-FLAG (**a**) or MamoAF-FLAG (**b**) under the control of *nos-Gal4* driver. Arrowheads indicate the signals of full-length Mamo-FLAG or MamoAF-FLAG in the nuclei of germline cysts in the germarium. Arrows indicate the full-length Mamo-FLAG signals in the nuclei of nurse cells in the egg chamber at stage 6. Scale bar: 20  $\mu\text{m}$ .

**a**

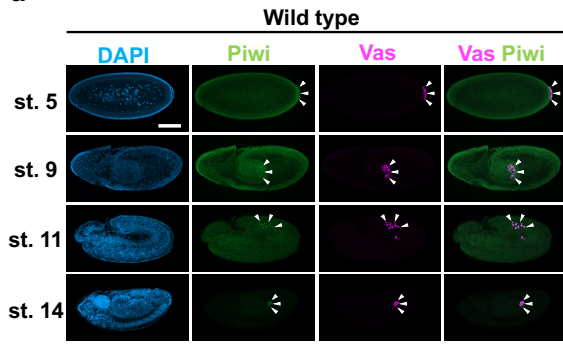

**b**

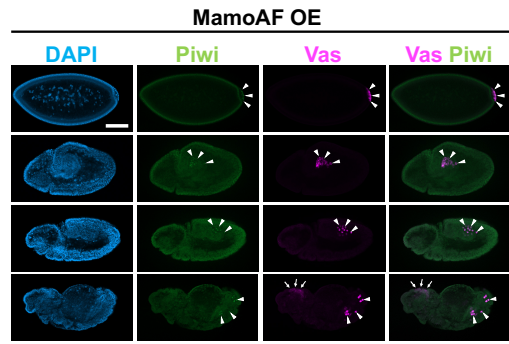

**Supplementary Figure 5** PGC formation and migration in MamoAF-OE embryos. Immunostaining of wild type **(a)** and MamoAF OE embryos **(b)**. Arrowheads indicate PGCs. Arrows indicate ectopic Vas signals. Piwi was used as a PGC marker. Maternal Piwi is enriched and maintained in PGCs during embryogenesis. Scale bar: 100  $\mu$ m.



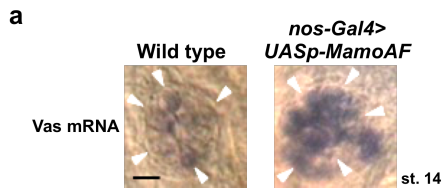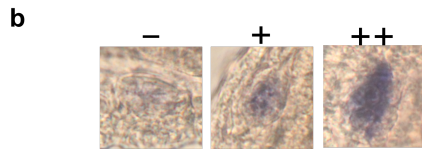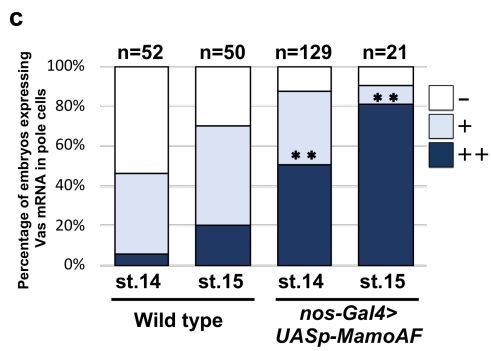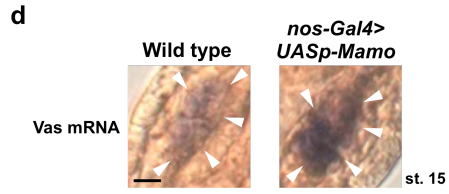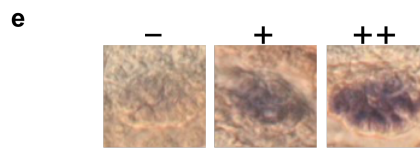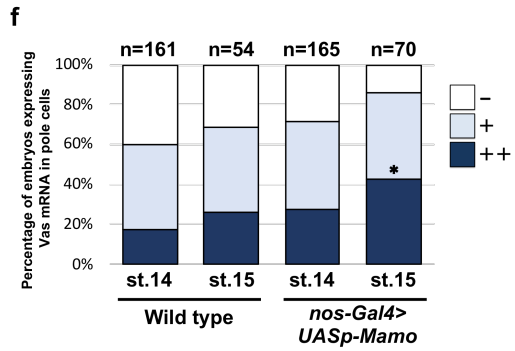

**Supplementary Figure 6** MamoAF and Mamo overexpression promote Vas mRNA expression in PGCs. **a** Vas mRNA *in situ* hybridisation of wild type and the embryos overexpressing MamoAF under the control of maternal *nos-Gal4* driver. Arrowheads indicate Vas mRNA expression in PGCs at stage 14. Scale bar: 10  $\mu$ m. **b** Embryos were classified into three groups depending on their strong (++) , middle (+) , and low (-) signal intensities of Vas mRNA in PGCs. **c** Percentages of the embryos carrying PGCs with strong, middle, and low signals in wild type and the embryos overexpressing MamoAF under the control of maternal *nos-Gal4* driver. \*\* $P < 0.01$  (Significances are calculated with wild type by Fisher's exact test). **d** Vas mRNA *in situ* hybridisation of wild type and the embryos overexpressing Mamo under the control of maternal *nos-Gal4* driver. Arrowheads indicate Vas mRNA expression in PGCs at stage 15. **e** Embryos were classified into three groups depending on their strong (++) , middle (+) , and low (-) signal intensities of Vas mRNA in PGCs. **f** Percentages of the embryos carrying PGCs with strong, middle, and low signals in wild type and the embryos overexpressing Mamo under the control of maternal *nos-Gal4* driver. \* $P < 0.05$  (Significances are calculated with wild type by Fisher's exact test).

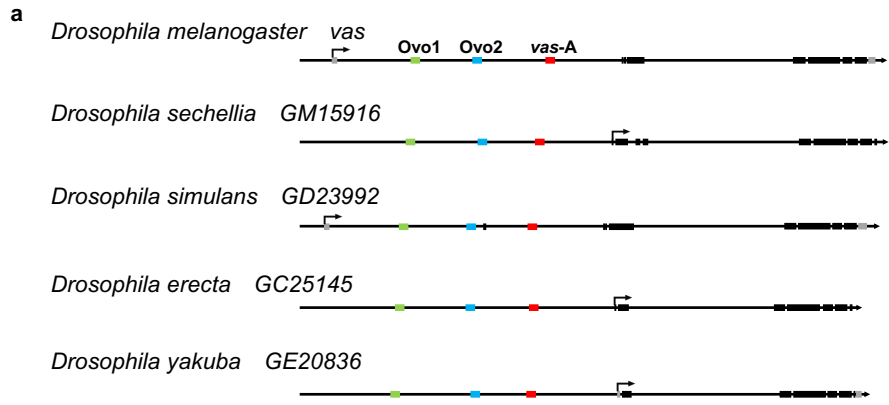

**b**

|                                | <b>vas-A</b>                          |
|--------------------------------|---------------------------------------|
| <i>Drosophila melanogaster</i> | ATTGTTTTTCC <b>TGCGT</b> TGCCTGCTGAGT |
| <i>Drosophila sechellia</i>    | TGTTTTTCC <b>TGCGT</b> TGCCTGCTGAGT   |
| <i>Drosophila simulans</i>     | TGTTTTTCC <b>TGCGT</b> TGCCTGCTGAGT   |
| <i>Drosophila erecta</i>       | TTTTCC <b>TGCGT</b> TGCCCTGCTGAGT     |
| <i>Drosophila yakuba</i>       | TGTTTTTCC <b>TGCGT</b> CGCCTGCTGAGT   |

**Supplementary Figure 7** *vas*-A element and Ovo binding consensus sequences in *vas* locus are conserved in several *Drosophila* species. **a** A schematic diagram of *vas* loci in *Drosophila melanogaster*, *Drosophila sechellia*, *Drosophila simulans*, *Drosophila erecta* and *Drosophila yakuba*. **b** *vas*-A element in *Drosophila melanogaster*, *Drosophila sechellia*, *Drosophila simulans*, *Drosophila erecta* and *Drosophila yakuba*. Red indicates Mamo binding consensus sequences.

**vas-A**

**gRNA**

Wild type GTAATTGGTTACGCGTAAACTGGGATGGAATTTGTTTTCTGCGTTGCCTGCTGAGTTTTATTTTCTGGTTGTCATGGAGTGGCTT  
*vas*<sup>df10-3</sup> GTAATTGGTTACGCGTAAACTGGGATGGAATTTGTTTT-----TGCCTGCTGAGTTTTATTTTCTGGTTGTCATGGAGTGGCTT

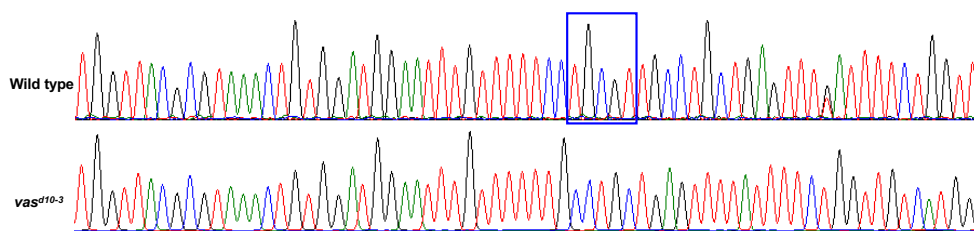

**Supplementary Figure 8** *vas*-A element is deleted in *vas*<sup>d10-3</sup> mutant. Sequences of the intronic region encompassing *vas*-A element of wild type and *vas*<sup>d10-3</sup>. Red indicates *vas*-A element. A blue box indicates a Mamo binding consensus sequence. *vas*<sup>d10-3</sup> mutation was generated by using CRISPER-Cas9 system. A line indicates the sequence corresponding guide RNA used for the mutagenesis.

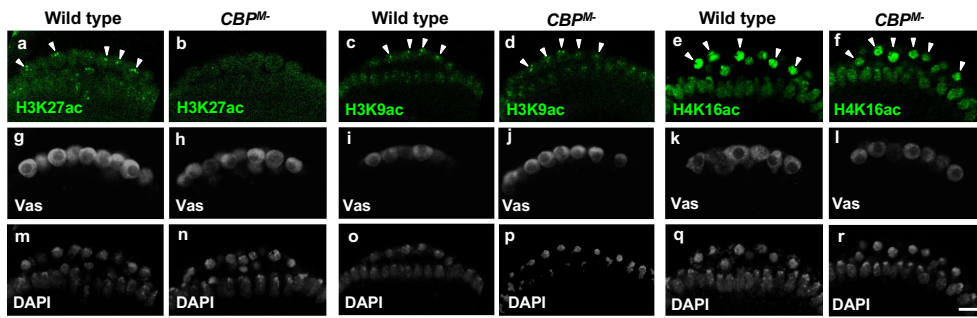

**Supplementary Figure 9** Maternal CBP activity is required for H3K27ac accumulation in PGCs. **a-r** Wild type embryos and *CBP<sup>M</sup>*- embryos derived from germline clones homozygous for *nej<sup>0.3</sup>* mutation at stage 5 are stained for histone modifications (**a-f**), Vas (**g-l**) and DAPI (**m-r**). Embryos are stained for H3K27ac (**a, b**), H3K9ac (**c, d**) and H4K16ac (**e, f**), respectively. Arrowheads indicate signals of the histone modification in PGCs. H3K27ac preferentially marks active enhancers. H3K9ac and H4K16ac, both of which are active histone markers. Scale bar: 10  $\mu$ m.



**a**

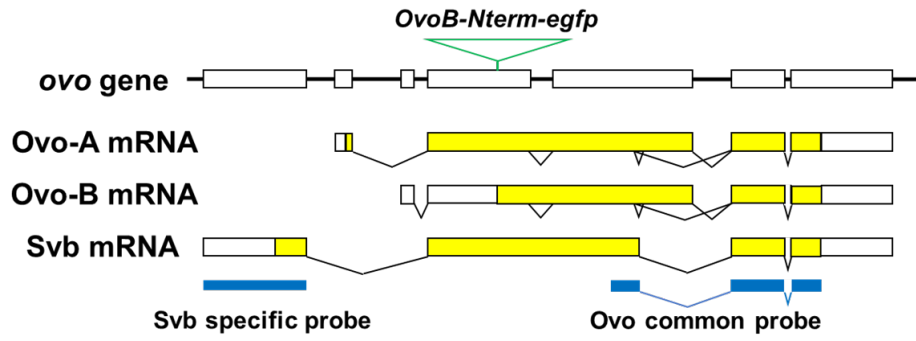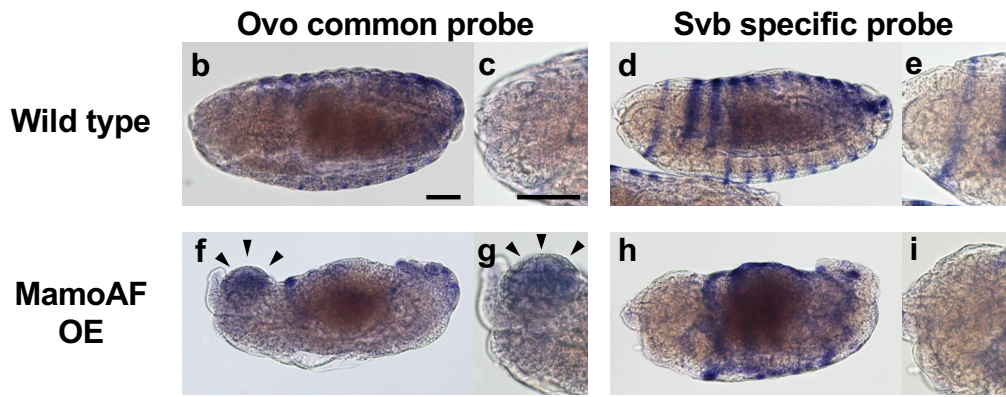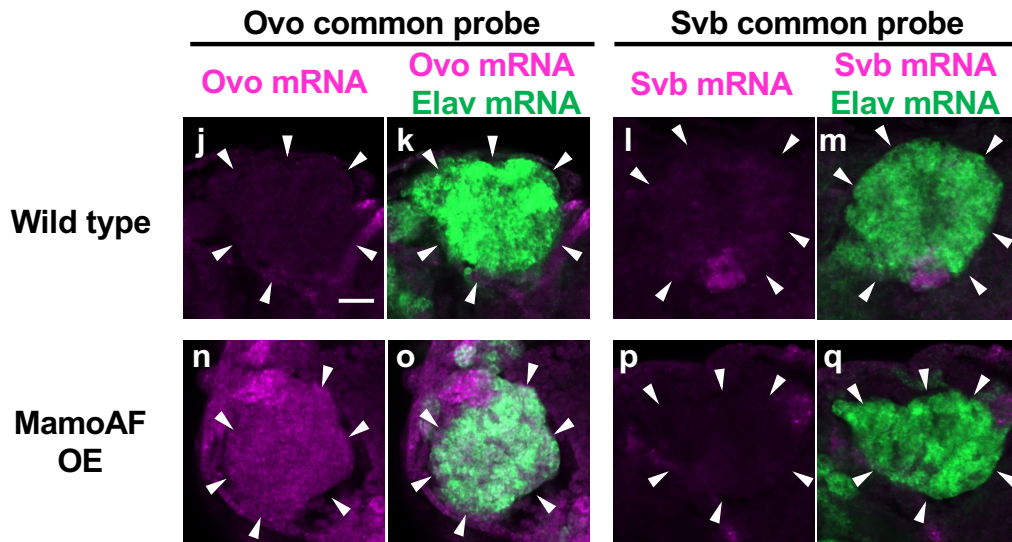

**Supplementary Figure 10** MamoAF induces ectopic Ovo mRNA expression in brain. **a** A schematic diagram of *ovo* locus. **b-i** *in situ* hybridisation of wild type embryos and MamoAF OE using an Ovo common probe (**b, c, f** and **g**) and a Svб specific probe (**d, e, h** and **i**). Right panels (**c, e, g** and **i**) are close-up views of brain of left panels (**b, d, f** and **h**), respectively. Arrowheads indicate ectopic Ovo signals. Scale bar: 50  $\mu\text{m}$ . **j-q** Double FISH of wild type embryos and MamoAF OE. Confocal sections of the brain of the embryos hybridised with Ovo and Elav probes (**j, k, n** and **o**) and with Svб and Elav probes (**l, m, p** and **q**). Elav is a neural marker. Scale bar: 20  $\mu\text{m}$ .

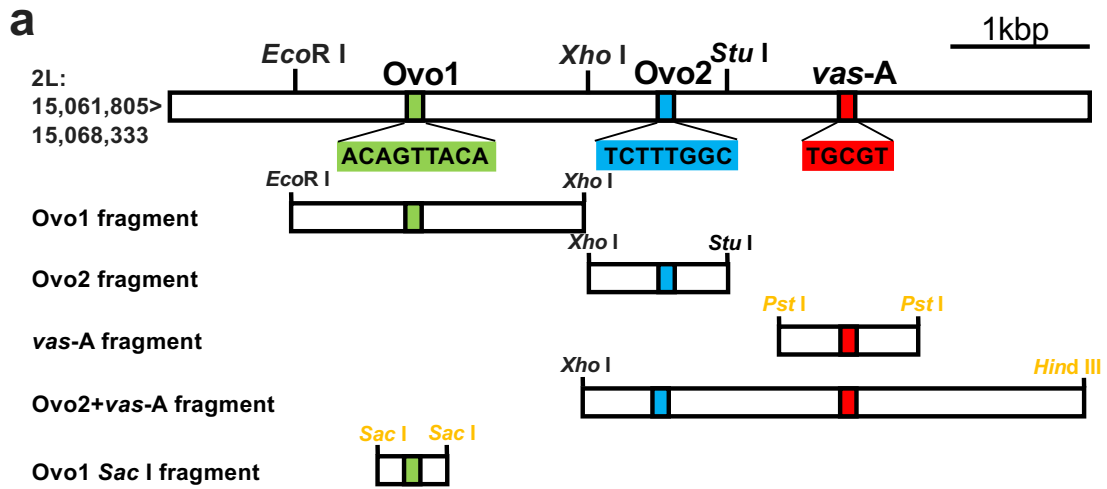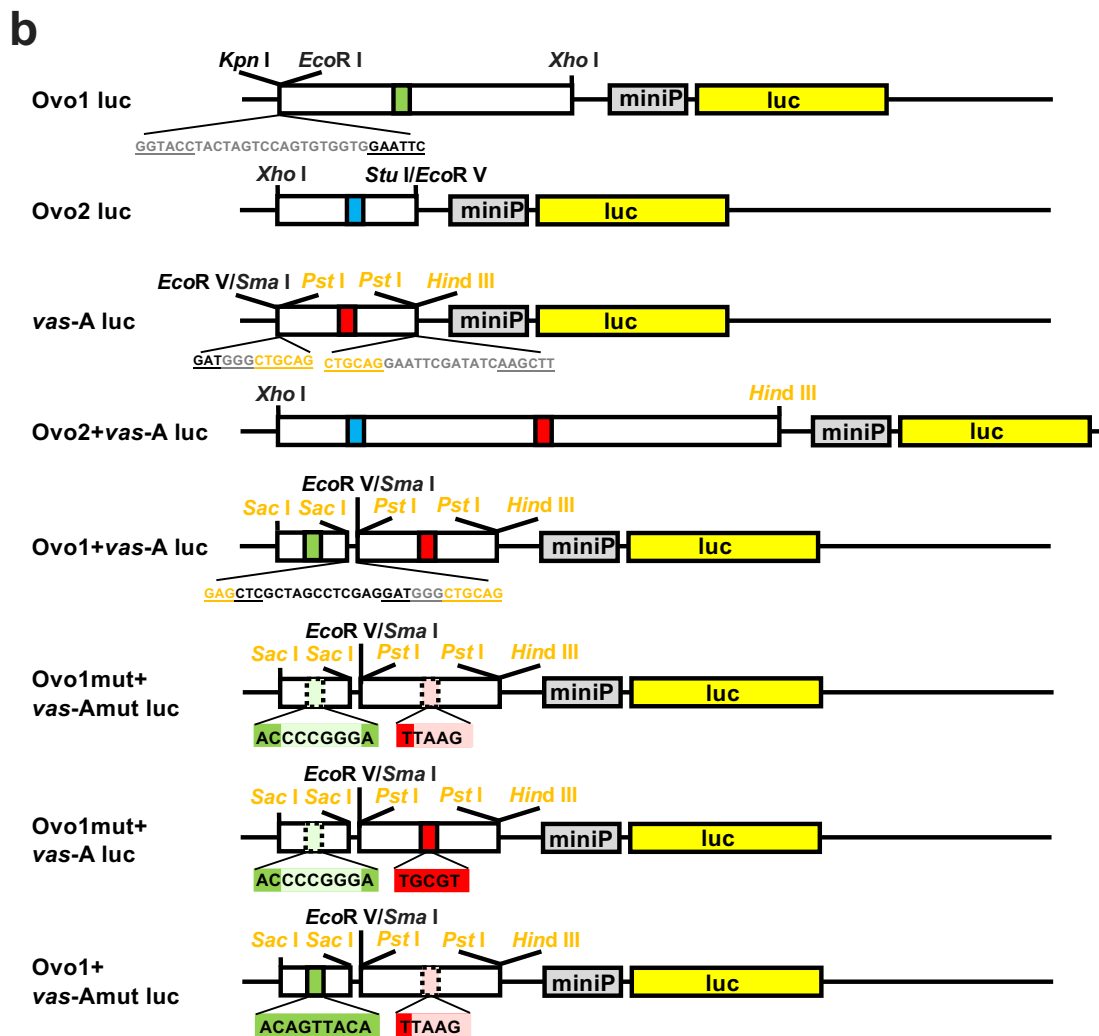

**Supplementary Figure 11** The luciferase reporter constructs containing cis-elements in the first intron of *vas*. **a** Schematic representation of the first intron of *vas* (2L: 15,061,805–15,068,333) and the genomic fragments containing the cis-elements used to construct the luciferase reporters. **b** Schematic representation of the luc reporter constructs used in this study. Restriction enzymes and linker sequences are shown. Restriction sites indicated by black are endogenous sites. Yellow indicates the primer-induced restriction sites. Gray box, mini promoter. Yellow box, luciferase reporter gene.

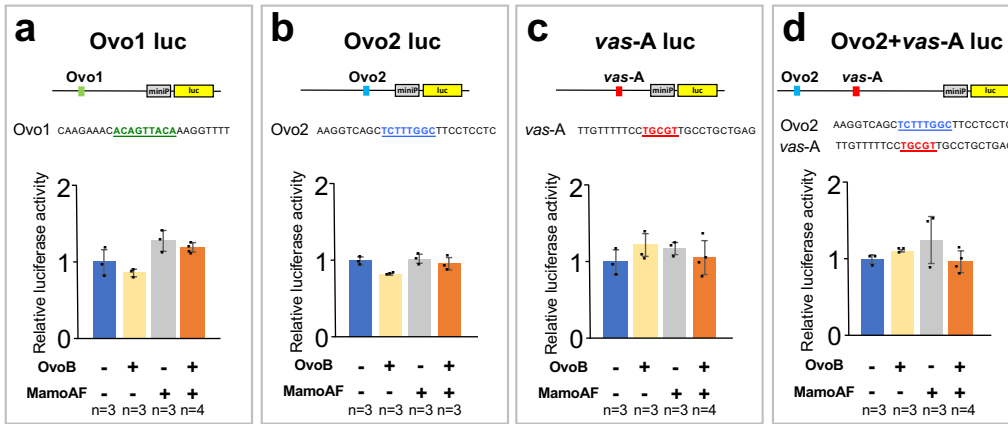

**Supplementary Figure 12** The individual cis-elements in the first intron of *vas* does not response to MamoAF and OvoB. The luciferase reporter constructs containing the *vas* intronic fragments, Ovo1 luc, Ovo2 luc, *vas*-A luc and Ovo2+*vas*-A luc were used for reporter assays. The mean of relative luciferase activities and SD are shown.

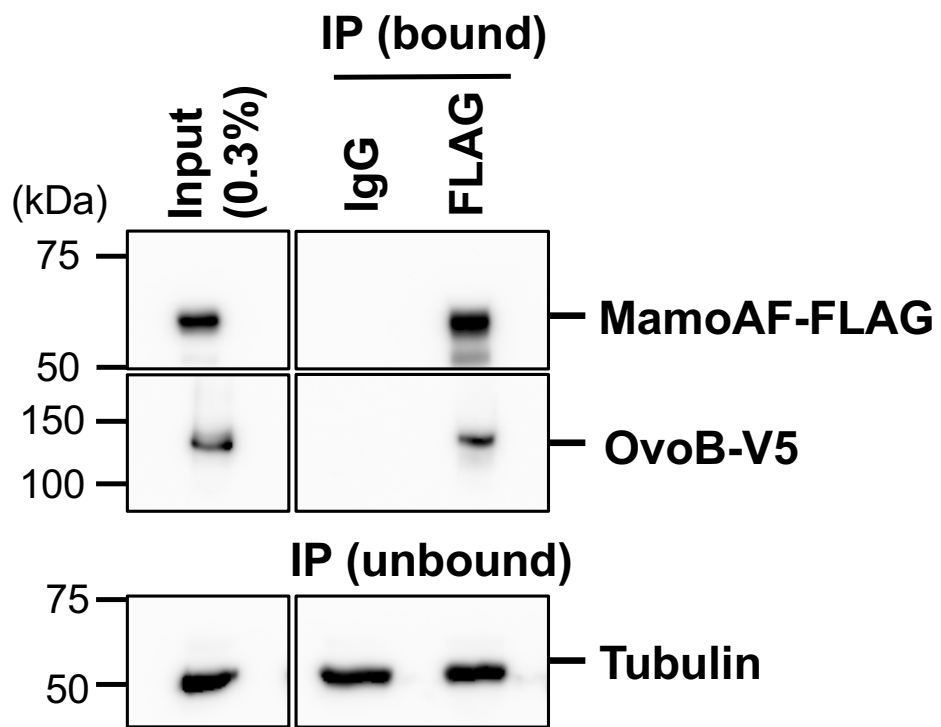

**Supplementary Figure 13** MamoAF interacts with OvoB. Immunoprecipitation assays with nuclear extracts of S2 cells that had been transfected with both FLAG-tagged MamoAF and V5-tagged OvoB. The precipitate with a FLAG antibody were analysed by FLAG and V5 antibodies.



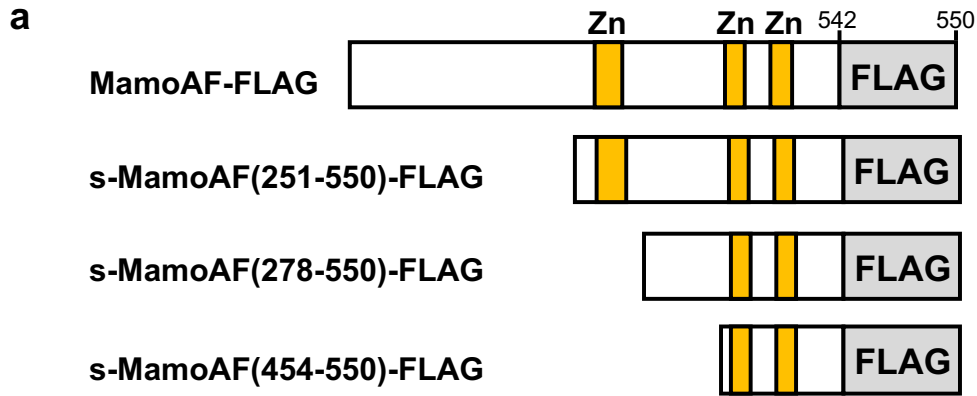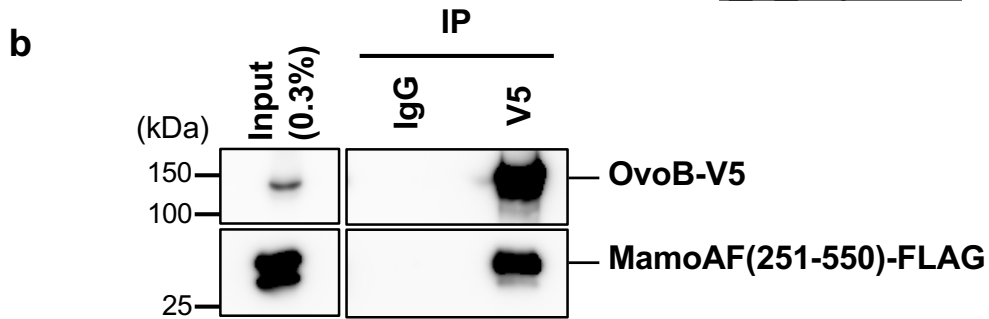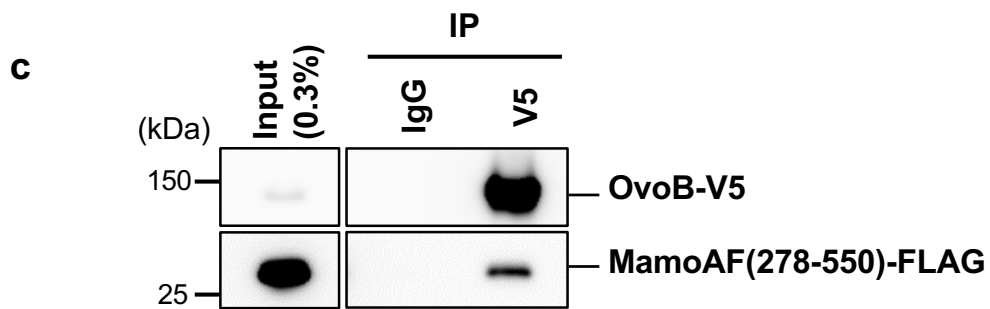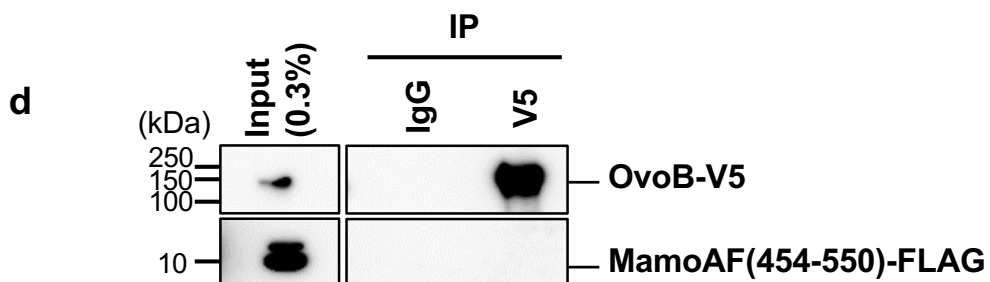

**Supplementary Figure 14** N-terminal region of MamoAF is required for the interaction with OvoB. **a** A schematic diagram of FLAG-tagged MamoAF fragments used for immunoprecipitation assays. **b-d** Immunoprecipitation assays with nuclear extracts of S2 cells that had been transfected with both V5-tagged OvoB and FLAG-tagged MamoAF fragments: MamoAF(251-550)-FLAG (**b**), MamoAF(278-550)-FLAG (**c**) and MamoAF(454-550)-FLAG (**d**).

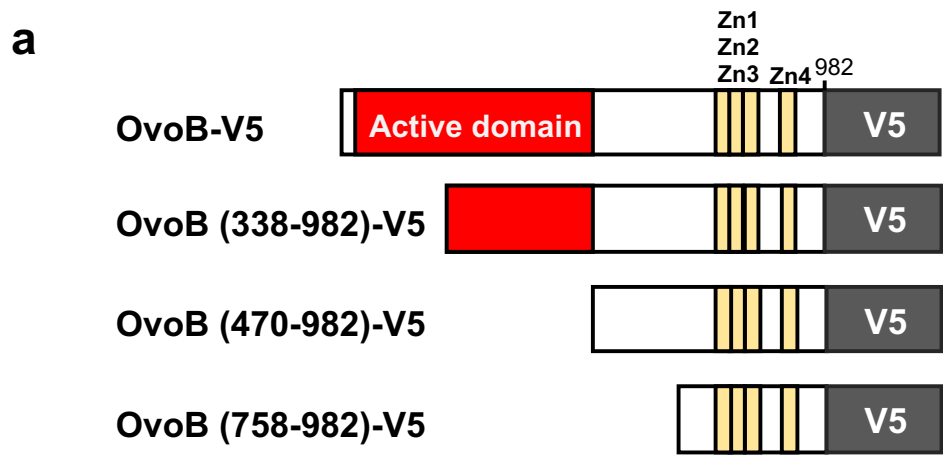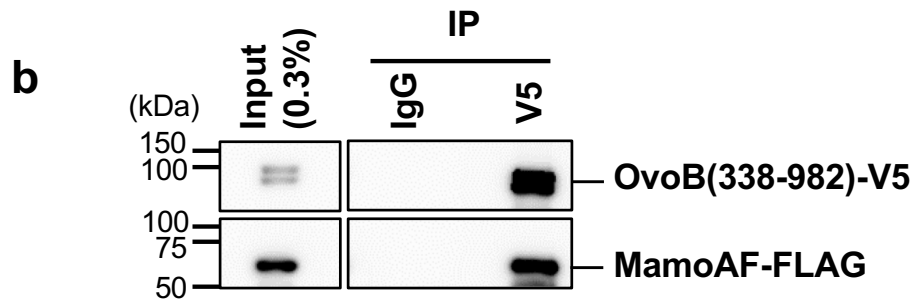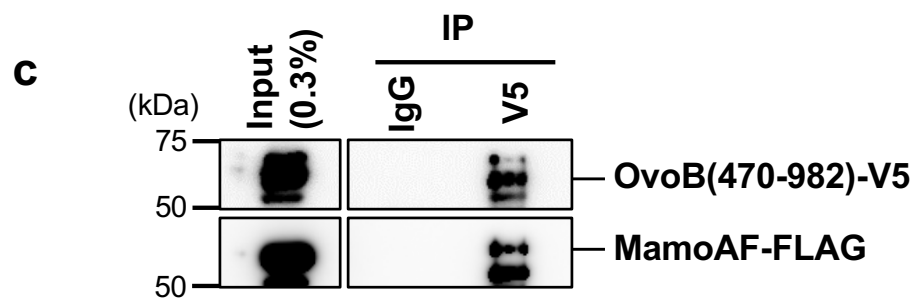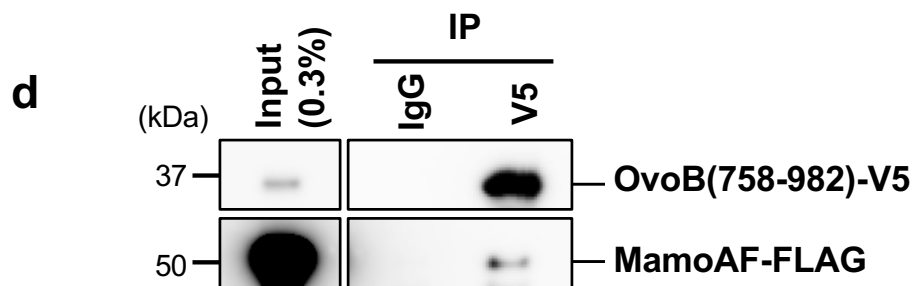

**Supplementary Figure 15** N-terminal region of OvoB enhances the interaction between MamoAF and OvoB. **a** A schematic diagram of V5-tagged OvoB fragments used for immunoprecipitation assays. **b-d** Immunoprecipitation assays with nuclear extracts of S2 cells that had been transfected with both MamoAF-FLAG and V5-tagged OvoB fragments: OvoB(338-982)-V5 (**b**), OvoB(470-982)-V5 (**c**) and OvoB(758-982)-V5 (**d**).

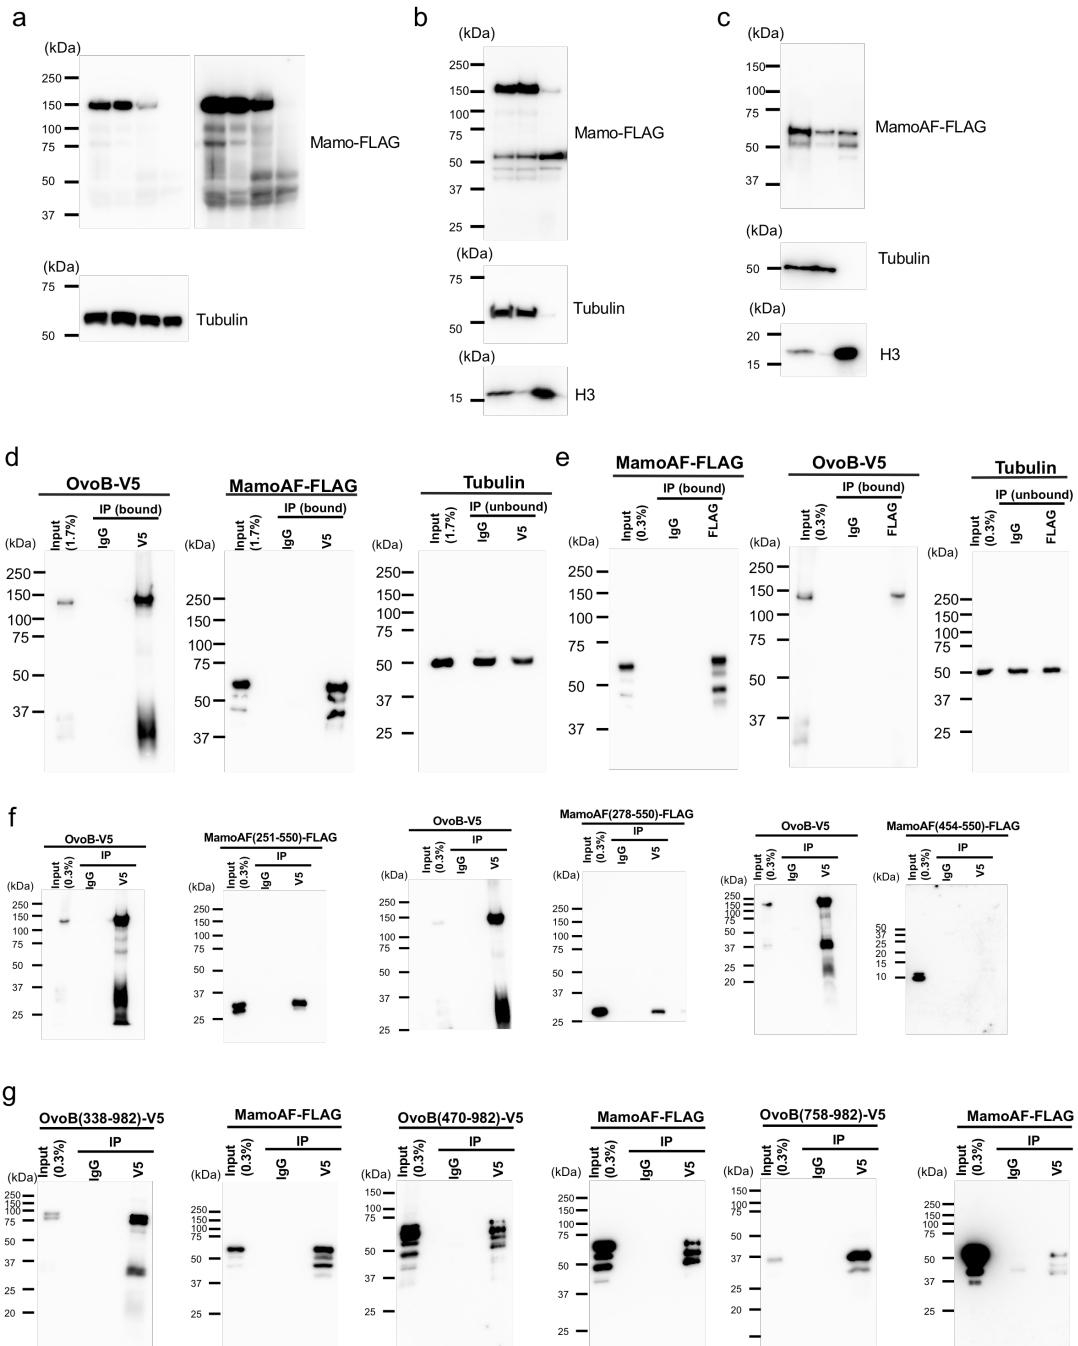

**Supplementary Figure 16 Original blots.**

**a** Original blots of Figure 1a. Membranes were cut before incubation with the antibody.

**b** Original blots of Figure 1b. Membranes were cut before incubation with the antibody.

**c** Original blots of Figure 1c. Membranes were cut before incubation with the antibody.

**d** Original blots of Figure 6g.

**e** Original blots of Supplementary Figure 13.

**f** Original blots of Supplementary Figure 14.

**g** Original blots of Supplementary Figure 15.

### Supplementary Table 1

Differentiation of egg chambers containing *mamo* germline clones can be rescued by overexpressing full-length Mamo-FLAG and MamoAF-FLAG

| Genotype <sup>a</sup>                                                                                                | Percentages of ovarioles with differentiating egg chambers (n) <sup>e</sup> |
|----------------------------------------------------------------------------------------------------------------------|-----------------------------------------------------------------------------|
| Wild type                                                                                                            | 97.7 (128)                                                                  |
| <i>mamo</i> <sup>SVA53</sup> / <i>mamo</i> <sup>SVA53</sup> , <i>nos-Gal4</i> <sup>b</sup>                           | 1.4 (74)                                                                    |
| <i>mamo</i> <sup>SVA53</sup> / <i>mamo</i> <sup>SVA53</sup> , <i>UASp-Mamo-FLAG</i> , <i>nos-Gal4</i> <sup>c</sup>   | 28.8 (73)                                                                   |
| <i>mamo</i> <sup>SVA53</sup> / <i>mamo</i> <sup>SVA53</sup> , <i>UASp-MamoAF-FLAG</i> , <i>nos-Gal4</i> <sup>d</sup> | 13.2 (197)                                                                  |

<sup>a</sup> Genotypes of females.

<sup>b</sup> Females with germline clones homozygous for the *mamo* mutation and carrying *nos-Gal4* driver were dissected and the ovaries were examined.

<sup>c</sup> Females with germline clones homozygous for the *mamo* mutation and carrying both *UASp-Mamo-FLAG* and *nos-Gal4* driver were dissected and the ovaries were examined.

<sup>d</sup> Females with germline clones homozygous for the *mamo* mutation and carrying both *UASp-MamoAF-FLAG* and *nos-Gal4* driver were dissected and the ovaries were examined.

<sup>e</sup> Ovarioles containing egg chambers after oogenic stage 6 were scored.

### Supplementary Table 2

Differentiation of mature eggs derived from *mamo* germline clones can be rescued by overexpressing full-length Mamo-FLAG but not MamoAF-FLAG

| Maternal genotype <sup>a</sup>                                                                                       | Eggs/h/female <sup>e</sup> | n | Hatching (%) <sup>f</sup> | n |
|----------------------------------------------------------------------------------------------------------------------|----------------------------|---|---------------------------|---|
| Wild type                                                                                                            | 1.07 ± 0.37                | 8 | 92.1 ± 1.5                | 8 |
| <i>mamo</i> <sup>SVA53</sup> / <i>mamo</i> <sup>SVA53</sup> , <i>nos-Gal4</i> <sup>b</sup>                           | 0                          | 4 | -                         | - |
| <i>mamo</i> <sup>SVA53</sup> / <i>mamo</i> <sup>SVA53</sup> , <i>UASp-Mamo-FLAG</i> , <i>nos-Gal4</i> <sup>c</sup>   | 0.29 ± 0.1                 | 4 | 36.9 ± 9.1                | 4 |
| <i>mamo</i> <sup>SVA53</sup> / <i>mamo</i> <sup>SVA53</sup> , <i>UASp-MamoAF-FLAG</i> , <i>nos-Gal4</i> <sup>d</sup> | 0                          | 4 | -                         | - |

<sup>a</sup> Genotypes of females.

<sup>b</sup> Females with germline clones homozygous for the *mamo* mutation and carrying *nos-Gal4* driver were used.

<sup>c</sup> Females with germline clones homozygous for the *mamo* mutation and carrying both *UASp-Mamo-FLAG* and *nos-Gal4* driver were used.

<sup>d</sup> Females with germline clones homozygous for the *mamo* mutation and carrying both *UASp-MamoAF-FLAG* and *nos-Gal4* driver were used.

<sup>e</sup> Females with each genotype were mated with *y w* males. 30–77 females were used. Eggs produced by the females were scored. Standard deviation is given.

<sup>f</sup> 30–151 embryos were collected, and incubated at 25 °C for 1 day. Hatching rate of embryos was scored. Standard deviation is given.
